# Supplementary material
Source: PubMed Central journal article supplement (PMC6658327)
Supplement: NIHMS1041492-supplement-supplement.pdf [file NIHMS1041492-supplement-supplement.pdf]

## Supplement

Table 3.

*Bivariate Correlations of Unresidualized and Residualized GAD, SAD, and MDD Symptoms with Self-reported Interpersonal Variables*

|                               | PA    | BC    | DE    | FG    | HI    | JK    | LM    | NO    | Dominance | Affiliation |
|-------------------------------|-------|-------|-------|-------|-------|-------|-------|-------|-----------|-------------|
| Unresidualized Symptom Scores |       |       |       |       |       |       |       |       |           |             |
| GAD                           | .17** | .24** | .26** | .34** | .35** | .39** | .41** | .23** | -.19**    | .13*        |
| SAD                           | .10   | .18** | .32** | .47** | .43** | .36** | .32** | .09   | -.34**    | -.03        |
| MDD                           | .21** | .27** | .31** | .40** | .33** | .35** | .39** | .20** | -.16**    | .04         |
| Residualized Symptom Scores   |       |       |       |       |       |       |       |       |           |             |
| GAD                           | .05   | .06   | .03   | .03   | .10   | .16** | .17** | .14** | -.02      | .15**       |
| SAD                           | -.03  | .04   | .17** | .29** | .27** | .16** | .09   | -.05  | -.29**    | -.09        |
| MDD                           | .13*  | .16** | .14** | .15** | .06   | .09   | .14** | .08   | .02       | -.02        |

*Note.* PA = Domineering, BC = Vindictive, DE = Cold, FG = Socially avoidant, HI = Nonassertive, JK = Exploitable, LM = Overly nurturant, NO = Intrusive. Residualized symptom scores were obtained by regressing one disorder (e.g., GAD) onto the two other disorders (e.g., SAD, MDD). \*  $p < .05$ . \*\*  $p < .001$ .
